# Supplementary material
Source: PubMed Central journal article supplement (PMC206449)
Supplement: nar_31_19_5776__1.pdf [file nar_31_19_5776__1.pdf]

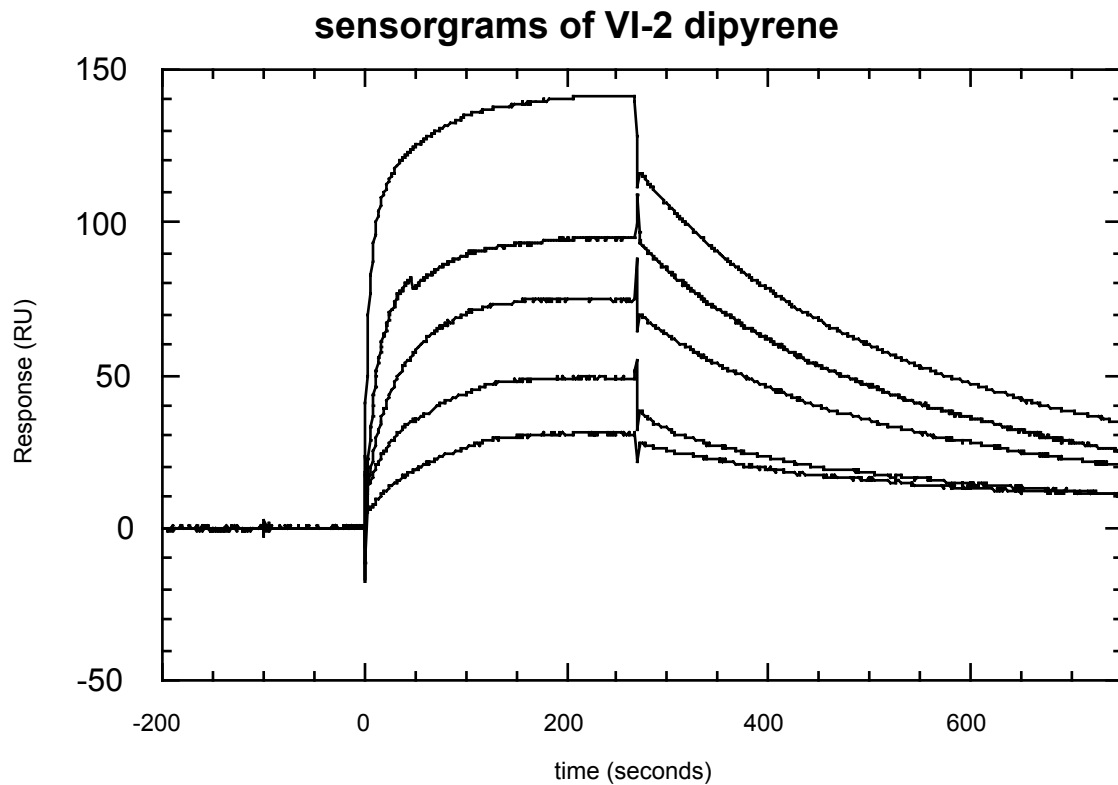

Sensorgrams obtained for binding of 50, 100, 200, 400 and 800 nM of aptamer VI-2 dipyrene to immobilised human RNase H1

Sensorgrams were fitted simultaneously to association and dissociation phases accordingly to a heterogeneous model (parallel binding to heterogeneous ligand due to non oriented immobilisation of the RNase H via its amine groups) with Biaevaluation 3.1 software.

Individual fittings provide dissociation constants ranging essentially (7 out of 10) from 10 to 30 nM
