# Supplementary material
Source: PubMed Central journal article supplement (PMC206449)
Supplement: nar_31_19_5776__3.pdf [file nar_31_19_5776__3.pdf]

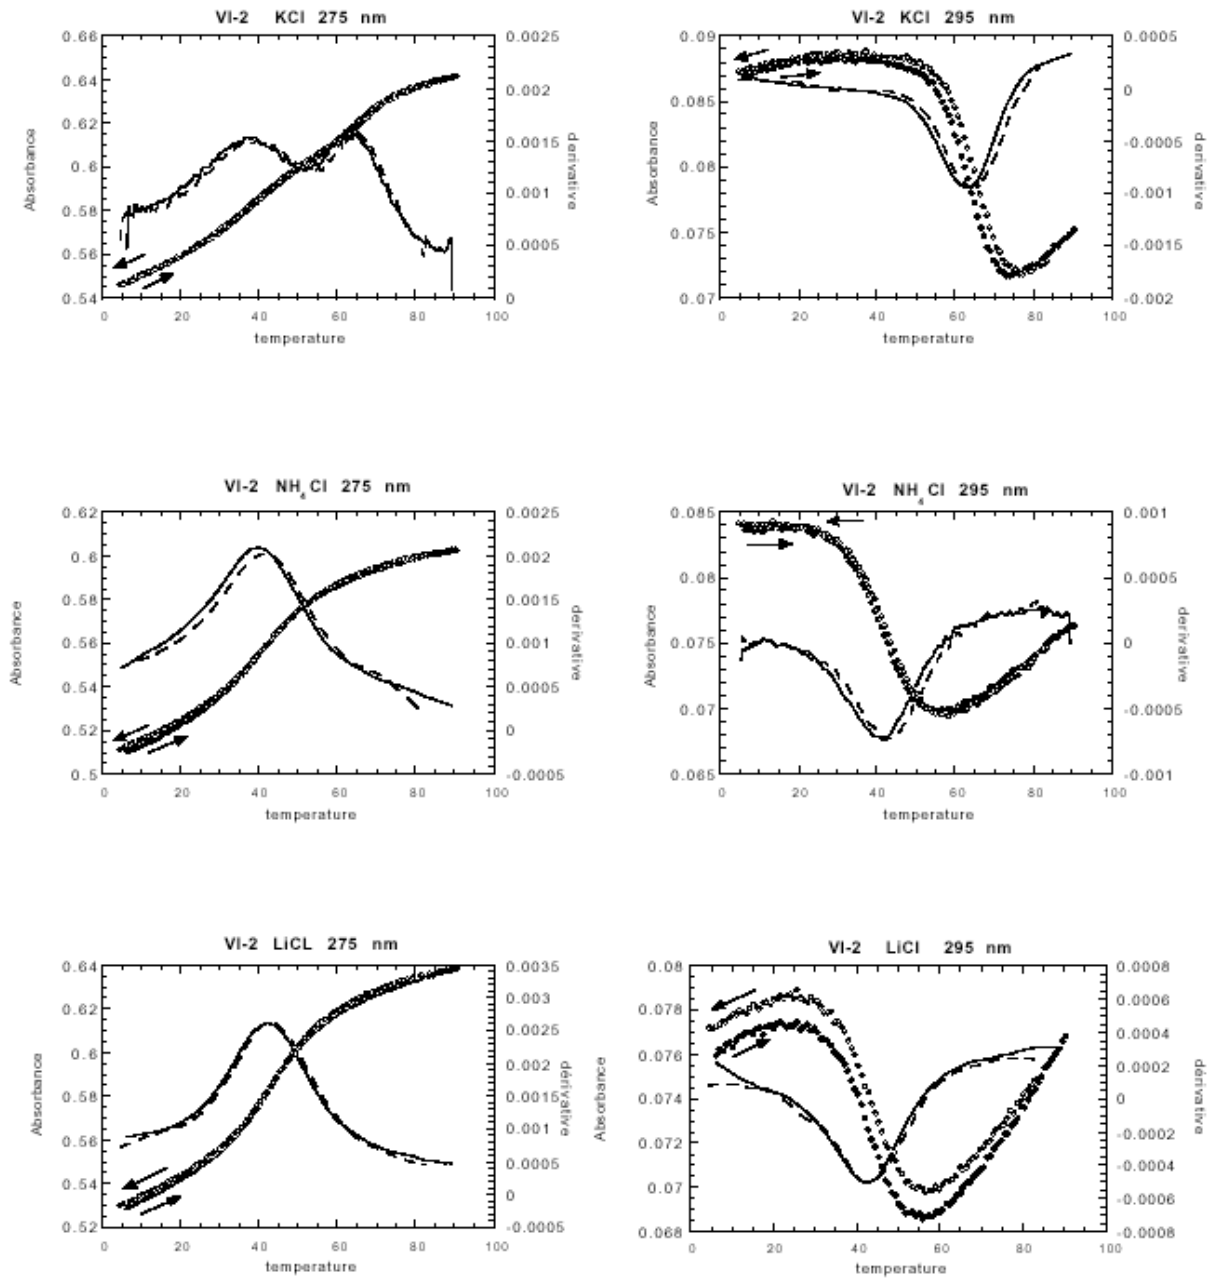

### Melting curves of aptamer VI-2.

Various salts were used in the buffers for generating melting curves (KCl, NH<sub>4</sub>Cl and LiCl, from top to bottom), monitored at 275 nm (left panels) and 295 nm (right panels). Closed and open circles correspond to data collected during increases or decreases in temperatures, respectively. A continuous line for ascending temperatures and a dotted line for descending temperatures indicates corresponding first derivatives.
